# Supplementary material
Source: PubMed Central journal article supplement (PMC2832993)

**SUPPLEMENTAL Figure 1**

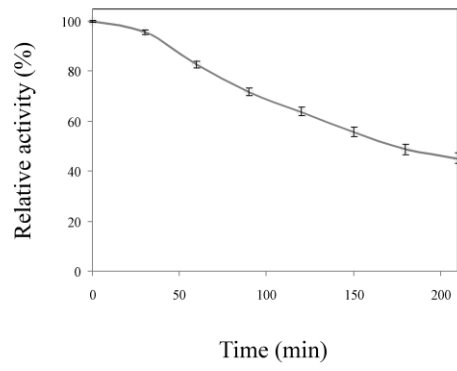

Supplement: supp_M109.084384_Fig-S1.pdf [file supp_M109.084384_Fig-S1.pdf]
